# Supplementary material for: A Transcriptomic Approach to the Recruitment of Venom Proteins in a Marine Annelid
Source: MDPI journal article supplement (doi:10.3390/toxins13020097), 2021-01-28
Supplement: s1 [file s1]

## Supplementary Material: A Transcriptomic Approach to the Recruitment of Venom Proteins in a Marine Annelid

Ana P. Rodrigo, Ana R. Grosso, Pedro V. Baptista, Alexandra R. Fernandes and Pedro M. Costa

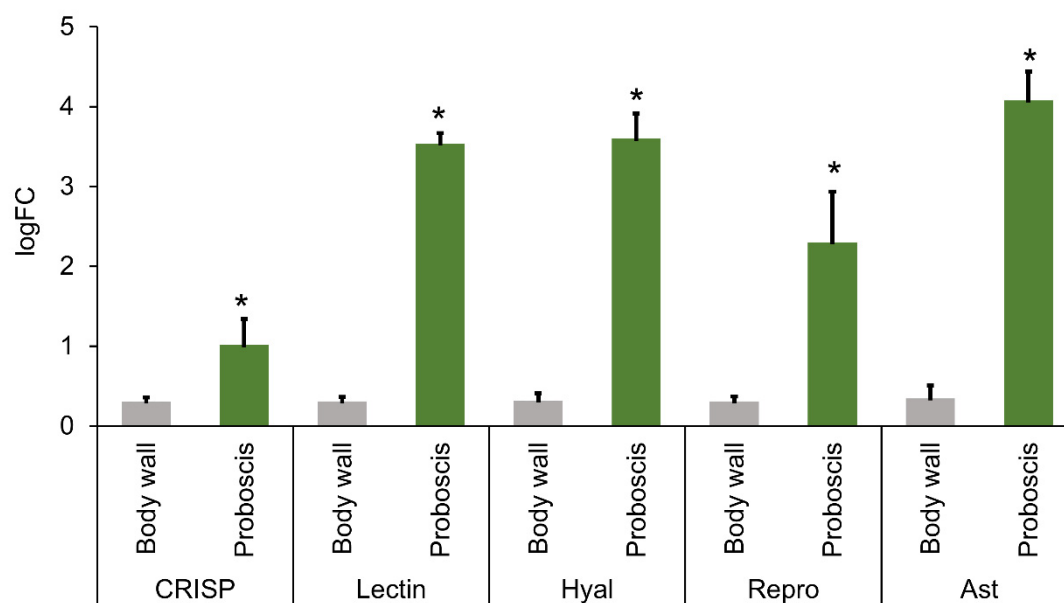

**Figure S1.** Expression analysis of key toxins by RT-qPCR, comparing the proboscis and body wall. Data are expressed as mean relative expression of *Crisp* (cysteine-rich venom protein), *Lectin* (C type lectin), *Hyal* (hyaluronidase), *Repro* (peptidase M12B) and *Ast* (astacin, peptidase M12A). The housekeeping gene *Gapdh* was used for normalization. \* Indicates significant differences to body wall for each respective target (Kruskal-Wallis  $H$ ,  $p < 0.05$ ).

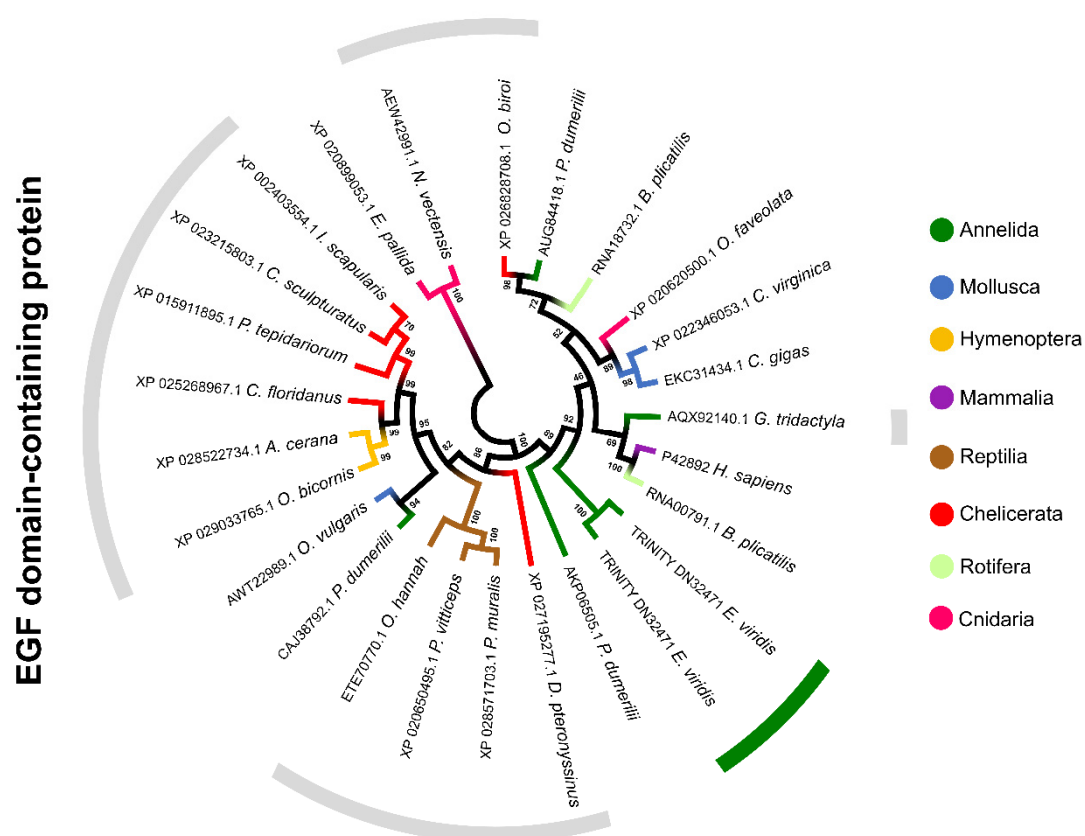

**Figure S2.** Phylogenetic trees of endothelin converting enzyme. This protein was shortlisted from ORFs with higher relative expression in the proboscis and best-matched against the Toxins database. Phylogenetic reconstruction was made with MEGA X, with 1000 bootstrap pseudoreplicates. Bootstrap support values are given for all nodes and clade names are indicated by colored branches. Grey bars identify known venomous or toxins-bearing organisms, whereas the green bar identifies *Eulalia* homologs.

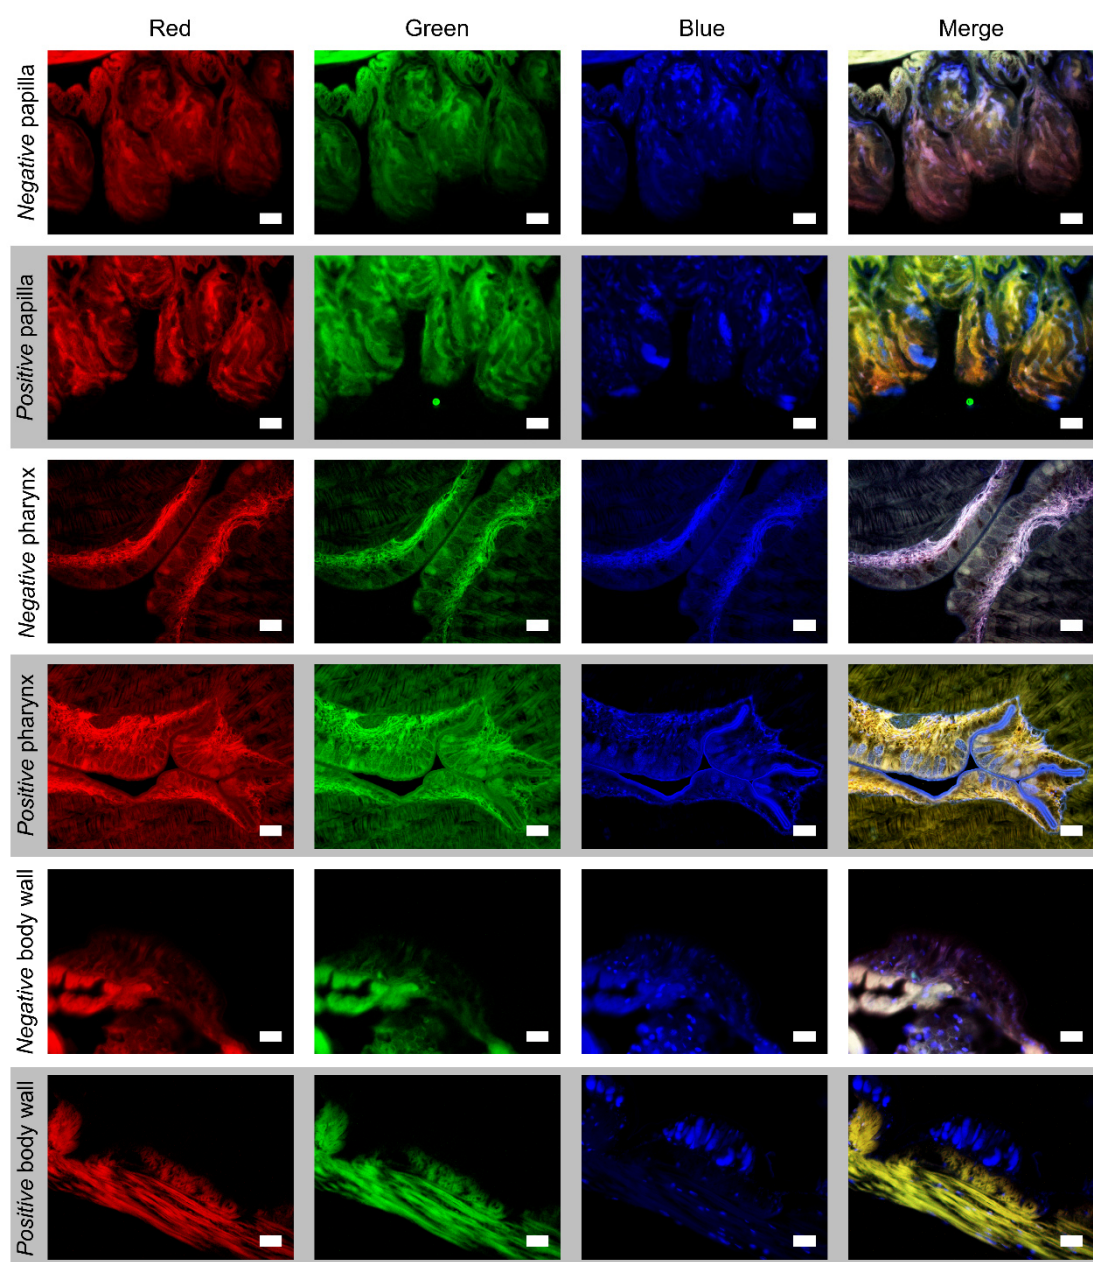

**Figure S3.** Channel-split fluorescent-labelled of thiols in various tissues of *Eulalia* as a marker for CRISPs. The histological (paraffin) sections were stained with a fluorescent histochemical marker for thiols after treatment with a reducing agent (DTT), producing a bluish labelling. Nuclear counterstaining was produced with DAPI. Negative controls were obtained by treating with DTT but no marker. Here are shown the Individual RGB channels plus respective composite image. Papilla and body wall samples were fixated in glutaraldehyde and pharynx samples in Bouin's solution. Papilla and pharynx present in the proboscis stained positive for thiol groups (granular blue cells) and mucocytes (due to the presence of sulphated mucins). Conversely, sections from the sensorial papillae and body wall stained positive only for mucocytes, which explains the differential expression of CRISPs (higher in the proboscis). Scale bars: 25  $\mu$ m.

**Table S1.** Hits of proteinaceous substances upregulated in the proboscis, compared to the body wall, with match against Toxins database. Proteins that have significantly higher expression ( $\log_{2}FC > 2$ ) in the proboscis and match in Toxins database, were matched against Pfam, NCBI nr customised for Toxins and Swissprot databases. (Excel).

**Table S2.** Primer sequences.

| Target               | Forward (5'–3')      | Reverse (5'–3')      | Amplicon Size (bp) |
|----------------------|----------------------|----------------------|--------------------|
| <i>Gapdh</i>         | CAGGGGTGCTAAGCAGTTGG | GAGAAGGCTGGGGCTCATTT | 165                |
| <i>Crisp</i>         | TGTAATGGCTGACGGTCTCG | AGAACATGATGTGGGGCTCG | 123                |
| <i>C type lectin</i> | TAGCCATGTCACTCAGCGTC | ACCTGCTCGAATAACGGTGG | 130                |
| <i>Hyal</i>          | ACGGAGCCATTTACCCCTTT | AGATTTTGAGCAGGCCACGA | 137                |
| <i>Reprolysin</i>    | GACACTGTGGCCTTACTCCC | TAATAGCTTCGGTCCCGTGC | 132                |
| <i>Astacin</i>       | TGACCAGGCAATCACAAGGG | CATGATGTTTCTCGCGCCAC | 134                |

**Table S3.** Translated aminoacid sequences from *Eulalia* used in phylogenetic analyses. (Excel)

**Table S4.** Accession numbers of sequences employed in multi-trait phylogenetics. The model combined CRISP, Hyaluronidase, Astacin, Reprolysin, C type lectin, Serine protease, Endothelin converting enzyme and EGF domain-containing homologs from representative species of key Eumetazoan phyla (venomous and non-venomous organisms). Refer to Figure. 4 in the main article for the full phylogenetic model.

| Species                          | Phylum      | CRISP          | Hyaluronidase  | C Type Lectin  | Serine Protease | Astacin        | Reprolysin     | EGF Domain-Containing Protein | Endothelin Converting Enzyme |
|----------------------------------|-------------|----------------|----------------|----------------|-----------------|----------------|----------------|-------------------------------|------------------------------|
| <i>Glycera dibranchiata</i>      | Annelida    | GASB01046798.1 | GASB01020098.1 | GASB01040405.1 | GASB01005460.1  | GASB01021908.1 | GASB01030463.1 | GASB01017903.1                | GASB01026619.1               |
| <i>Capitella teleta</i>          | Annelida    | ELU09214.1     | ELT97073.1     | ELT92401.1     | ELU12131.1      | ELT93756.1     | ELT98077.1     | ELU11161.1                    | ELT90095.1                   |
| <i>Parasteatoda tepidariorum</i> | Chelicerata | XP_015904653.1 | XP_015922490.1 | XP_021000063.1 | XP_015908189.2  | XP_015905753.1 | XP_015921582.1 | XP_015911895.1                | XP_015927713.1               |
| <i>Stegodyphus mimosarum</i>     | Chelicerata | KFM73511.1     | KFM61642.1     | KFM65020.1     | KFM57227.1      | KFM60032.1     | KFM61983.1     | KFM70600.1                    | KFM77382.1                   |
| <i>Centruroides sculpturatus</i> | Chelicerata | XP_023221739.1 | XP_023226974.1 | XP_023222872.1 | XP_023218618.1  | XP_023222430.1 | XP_023240235.1 | XP_023215803.1                | XP_023211934.1               |
| <i>Exaiptasia pallida</i>        | Cnidaria    | XP_020904389.1 | XP_020913987.1 | XP_028518136.1 | XP_020916782.1  | XP_020907018.2 | XP_020916248.1 | XP_020899053.1                | XP_020899185.1               |
| <i>Pocillopora damicornis</i>    | Cnidaria    | XP_027048055.1 | XP_027044971.1 | RMX49478.1     | RMX51212.1      | XP_027055506.1 | XP_027050425.1 | XP_027051833.1                | XP_027046906.1               |
| <i>Apis mellifera</i>            | Hymenoptera | XP_016766808.1 | NP_001011619.1 | XP_397293.3    | XP_016769420.1  | XP_003250231.1 | XP_006562833.2 | XP_026295156.1                | XP_392043.3                  |
| <i>Homo sapiens</i>              | Mammalia    | AAI01540.1     | AAH05896.1     | AAA35726.1     | XP_011518940.1  | AAH13871.1     | EAH62382.1     | NP_060087.3                   | NP_001106819.1               |
| <i>Rattus norvegicus</i>         | Mammalia    | AAD48090.1     | NP_997482.2    | 1TDQ_B         | EDL83068.1      | EDL94198.1     | NP_001101903.1 | NP_001099191.1                | BAA06152.1                   |
| <i>Octopus bimaculoides</i>      | Mollusca    | XP_014790560.1 | XP_014771328.1 | KOF89271.1     | XP_014787085.1  | KOF87573.1     | KOF93529.1     | XP_014781344.1                | XP_014790282.1               |
| <i>Mizuhopecten yessoensis</i>   | Mollusca    | XP_021366565.1 | XP_021353240.1 | XP_021341992.1 | XP_021351138.1  | XP_021365700.1 | XP_021341707.1 | XP_021342460.1                | XP_021353180.1               |
| <i>Pomacea canaliculata</i>      | Mollusca    | XP_025083739.1 | XP_025098740.1 | XP_025083615.1 | XP_025114564.1  | XP_025092025.1 | XP_025104189.1 | PVD22447.1                    | XP_025083320.1               |
| <i>Python bivittatus</i>         | Reptilia    | XP_025028116.1 | XP_007420722.1 | XP_007422481.1 | XP_025032198.1  | XP_007434871.1 | XP_007422351.1 | XP_007426224.1                | XP_007441074.1               |
| <i>Paroedura picta</i>           | Reptilia    | GCF55372.1     | GCF53585.1     | GCF42045.1     | GCF56440.1      | GCF44322.1     | GCF58184.1     | GCF55798.1                    | GCF49036.1                   |
| <i>Danio rerio</i>               | Teleostei   | XP_021322709.1 | NP_001121765.1 | XP_002660413.1 | NP_001099071.1  | AAH95288.1     | XP_700384.3    | XP_005168706.1                | NP_001071260.1               |
| <i>Cyprinus carpio</i>           | Teleostei   | XP_018974179.1 | KTF93957.1     | KTG02892.1     | KTF77069.1      | XP_018918842.1 | KTG21912.1     | AOW71522.1                    | KTF75647.1                   |
| <i>Carassius auratus</i>         | Teleostei   | XP_026109449.1 | XP_026115374.1 | XP_026061246.1 | XP_026069014.1  | XP_026090900.1 | XP_026090266.1 | XP_026067988.1                | XP_026131351.1               |
